# Supplementary material for: Assessment of Discordance Between Physicians and Family Members Regarding Prognosis in Patients With Severe Acute Brain Injury
Source: PubMed Central journal article supplement (PMC8531991; doi:10.1001/jamanetworkopen.2021.28991), 2021-10-21
Supplement: jamanetwopen-e2128991-s001.pdf [file jamanetwopen-e2128991-s001.pdf]

## Supplementary Online Content

Kiker WA, Rutz Voumard R, Andrews LIB, et al. Assessment of discordance between physicians and family members regarding prognosis in patients with severe acute brain injury. *JAMA Netw Open*. 2021;4(10):e2128991. doi:10.1001/jamanetworkopen.2021.28991

**eFigure.** Enrollment and Participation of Families, Physicians, and Nurses

**eTable.** Unadjusted Associations for Different Types of Discordance

This supplementary material has been provided by the authors to give readers additional information about their work.

**eFigure.** Enrollment and Participation of Families, Physicians, and Nurses

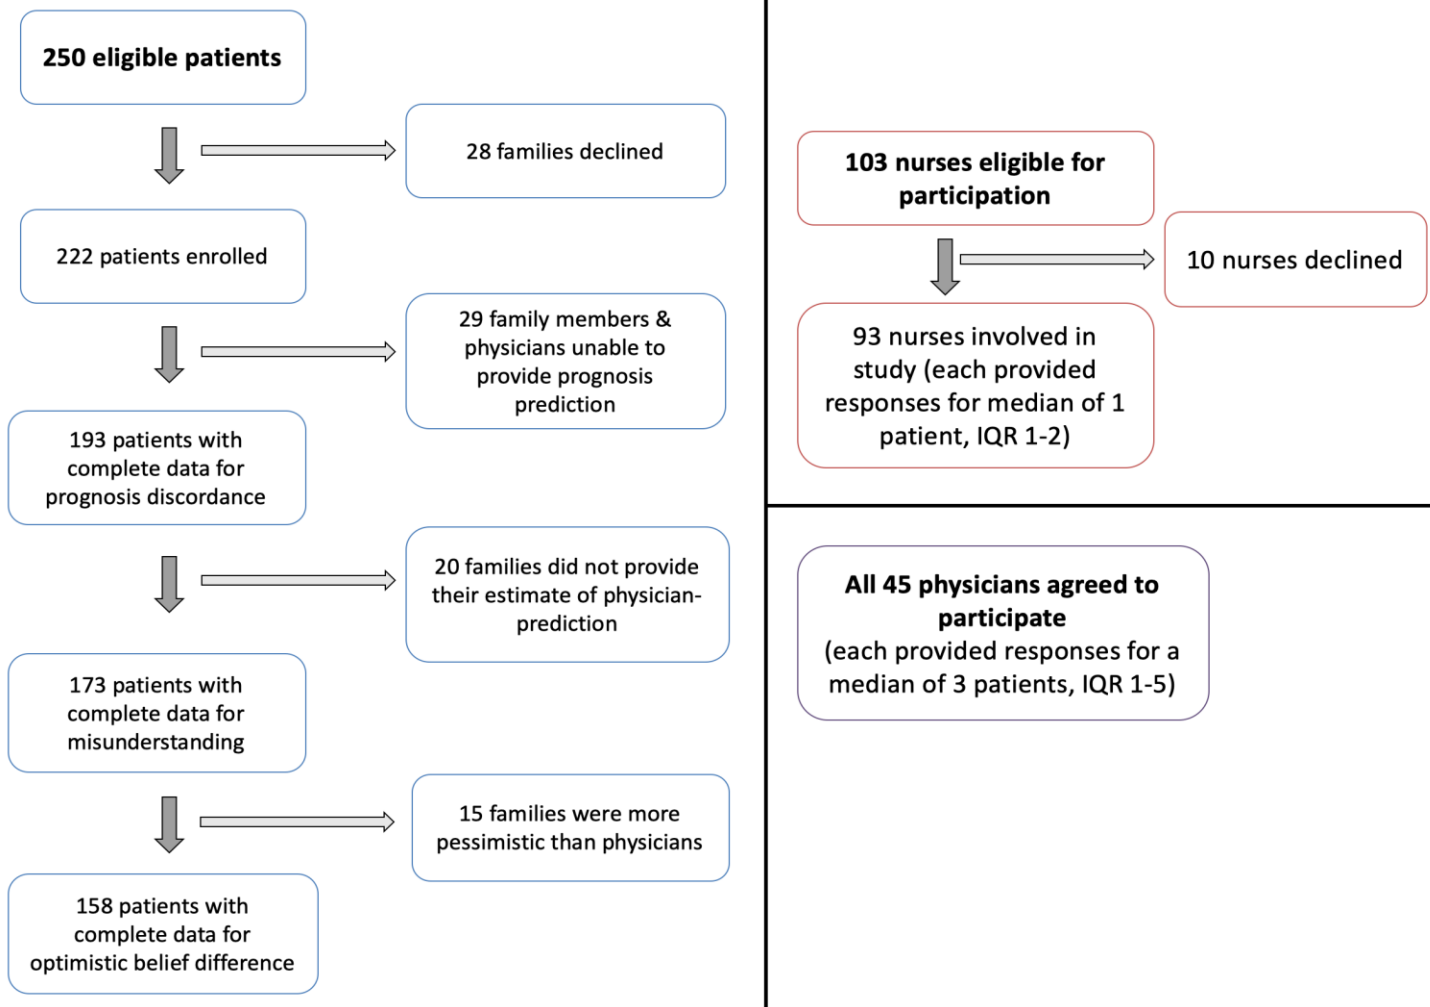

Patients were only included in the evaluation of each outcome if complete data were available. For evaluation of misunderstanding, family-physician pairs were only included when physicians provided their prediction and families provided an estimate for physician-prediction (n=173). For evaluation of optimistic belief difference (vs no difference), we only included pairs where families provided both their own prognosis prediction and an estimate for physician-prediction, and we excluded those with pessimistic belief difference, leaving 158 patients.

**eTable.** Unadjusted Associations for Different Types of Discordance

| Characteristic                                              | OVERALL PROGNOSIS DISCORDANCE (n=193) |                         | OPTIMISTIC PROGNOSIS DISCORDANCE (n=174) |                         | MISUNDERSTANDING (n=173) |                   | OPTIMISTIC BELIEF DIFFERENCES (n=158) |                   |
|-------------------------------------------------------------|---------------------------------------|-------------------------|------------------------------------------|-------------------------|--------------------------|-------------------|---------------------------------------|-------------------|
|                                                             | OR (95% CI)                           | P Value                 | OR (95% CI)                              | P Value                 | OR (95% CI)              | P Value           | OR (95% CI)                           | P Value           |
| Patient Age, years                                          | <b>0.98 (0.97,1)</b>                  | <b>0.03</b>             | <b>0.98 (0.97,1)</b>                     | <b>0.04</b>             | 0.99 (0.97,1)            | 0.11              | 0.99 (0.98,1.01)                      | 0.46              |
| Female family member                                        | 1.21 (0.66,2.21)                      | 0.54                    | 1.14 (0.61,2.13)                         | 0.68                    | 0.84 (0.45,1.59)         | 0.59              | 1.04 (0.53,2.05)                      | 0.91              |
| BIPOC family member                                         | <b>3.33 (1.55,7.18)</b>               | <b>&lt;0.01</b>         | <b>3.88 (1.78,8.47)</b>                  | <b>&lt;0.01</b>         | 1.86 (0.94,3.66)         | 0.07              | <b>2.12 (1.01,4.46)</b>               | <b>0.05</b>       |
| Hispanic family member                                      | 0.6 (0.24,1.52)                       | 0.28                    | 0.57 (0.21,1.53)                         | 0.26                    | 0.59 (0.22,1.56)         | 0.29              | 1.55 (0.56,4.32)                      | 0.40              |
| Disease Category                                            |                                       | 0.32 <sup>a</sup>       |                                          | 0.39 <sup>a</sup>       |                          | 0.28 <sup>a</sup> |                                       | 0.68 <sup>a</sup> |
| Ischemic Stroke                                             | (Reference)                           |                         | (Reference)                              |                         | (Reference)              |                   | (Reference)                           |                   |
| Intra-parenchymal hemorrhage                                | 2.3 (0.88,6.03)                       | 0.09                    | 2.11 (0.8,5.56)                          | 0.13                    | 2.44 (0.89,6.7)          | 0.08              | 1.02 (0.37,2.86)                      | 0.97              |
| Subarachnoid hemorrhage                                     | 1.8 (0.75,4.34)                       | 0.19                    | 1.43 (0.58,3.51)                         | 0.44                    | 2.56 (0.96,6.8)          | 0.06              | 1.51 (0.55,4.16)                      | 0.43              |
| Traumatic brain injury                                      | 1.63 (0.71,3.77)                      | 0.25                    | 1.2 (0.51,2.84)                          | 0.68                    | 2.13 (0.85,5.35)         | 0.11              | 0.89 (0.36,2.2)                       | 0.80              |
| Cardiac arrest                                              | 2.29 (0.72,7.31)                      | 0.16                    | 1.94 (0.59,6.33)                         | 0.28                    | 2.04 (0.61,6.84)         | 0.25              | 1.08 (0.31,3.8)                       | 0.90              |
| Family Member Relationship                                  |                                       | <b>0.04<sup>a</sup></b> |                                          | <b>0.03<sup>a</sup></b> |                          | 0.40 <sup>a</sup> |                                       | 0.62 <sup>a</sup> |
| Spouse/Partner                                              | (Reference)                           |                         | (Reference)                              |                         | (Reference)              |                   | (Reference)                           |                   |
| Mother/Father                                               | 2.27 (0.9,5.72)                       | 0.08                    | 1.97 (0.74,5.25)                         | 0.17                    | 1.61 (0.63,4.08)         | 0.32              | 1.78 (0.67,4.76)                      | 0.25              |
| Sister/Brother                                              | <b>5.07 (1.51,16.95)</b>              | <b>&lt;0.01</b>         | <b>4.58 (1.32,15.93)</b>                 | <b>0.02</b>             | 2.58 (0.79,8.45)         | 0.12              | 1.4 (0.41,4.71)                       | 0.59              |
| Son/Daughter                                                | <b>2.05 (1.4,2)</b>                   | <b>0.05</b>             | 2.09 (0.99,4.4)                          | 0.05                    | 1.57 (0.73,3.36)         | 0.25              | 2.1 (0.93,4.72)                       | 0.08              |
| Other                                                       | 3.1 (0.98,9.85)                       | 0.06                    | <b>3.66 (1.14,11.77)</b>                 | <b>0.03</b>             | 1.94 (0.64,5.91)         | 0.25              | 1.5 (0.48,4.66)                       | 0.49              |
| Nurse perception of family understanding, fair or worse     | <b>3.75 (1.98,7.13)</b>               | <b>&lt;0.01</b>         | <b>4.48 (2.31,8.7)</b>                   | <b>&lt; .01</b>         | <b>2.1 (1.13,3.89)</b>   | <b>0.02</b>       | 1.68 (0.87,3.24)                      | 0.12              |
| Physician perception of family understanding, fair or worse | 1.61 (0.87,2.96)                      | 0.13                    | 1.74 (0.92,3.26)                         | 0.09                    | 1.27 (0.68,2.36)         | 0.46              | <b>2.53 (1.25,5.13)</b>               | <b>0.01</b>       |
| Amount of Trust Family has in the Information Received      | 0.69 (0.37,1.26)                      | 0.23                    | 0.64 (0.34,1.2)                          | 0.16                    | 0.75 (0.4,1.39)          | 0.36              | 0.61 (0.31,1.2)                       | 0.15              |

BIPOC indicates black, indigenous, and people of color; <sup>a</sup> Overall p value for group
